# Supplementary material for: Reduction of silver ions in molybdates: elucidation of framework acidity as the factor controlling charge balance mechanisms in aqueous zinc-ion electrolyte
Source: Royal Society of Chemistry journal article supplement (doi:10.1039/d1ra07765a), 2021-01-01
Supplement: d1ra07765a1.pdf [file d1ra07765a1.pdf]

## Supporting information for:

# Reduction of Silver Ions in Molybdates: Elucidation of Framework Acidity as the Factor Controlling Charge Balance Mechanisms in Aqueous Zinc-Ion Electrolyte

*Derrick Combs<sup>1</sup>, Brendan Godsel<sup>1</sup>, Julie Pohlman-Zordan<sup>1</sup>, Allen Huff<sup>1</sup>, Jackson King<sup>1</sup>, Rob  
Richter<sup>2</sup>, and Paul F. Smith<sup>1\*</sup>*

<sup>1</sup>Department of Chemistry, Valparaiso University, 1710 Chapel Drive, Valparaiso IN 46383

<sup>2</sup>Department of Chemistry and Physics, Chicago State University, 9501 S. King Drive, Chicago  
IL 60628

| Material                                             | Electrolyte                                | Voltage (V) | Specific Capacity (first, mAh/g) | Retention %/cycle  | Ref |
|------------------------------------------------------|--------------------------------------------|-------------|----------------------------------|--------------------|-----|
| $\text{Ag}_{0.33}\text{V}_2\text{O}_5$               | 2 M $\text{Zn}(\text{CF}_3\text{SO}_3)_2$  | 0.2-1.6     | 418 (0.2 A/g)                    | ~60%/100 @ 0.5A/g  | 1   |
| $\text{Ag}_{0.4}\text{V}_2\text{O}_5$                | 3M $\text{ZnSO}_4$                         | 0.4-1.4     | ~320 (0.5 A/g)                   | ~70%/1000 @ 5A/g   | 2   |
| $\text{Ag}_{0.33}\text{V}_2\text{O}_5$               | 2M $\text{ZnSO}_4$                         | 0.4-1.4     | 350 (0.05 A/g)                   | 83%/100 @ 1A/g     | 3   |
| $\text{Ag}_{1.2}\text{V}_3\text{O}_8$                | 2M $\text{ZnSO}_4$                         | 0.4-1.4     | 350 (0.05 A/g)                   | ~80%/100 @ 1A/g    | 3   |
| $\text{Ag}_2\text{V}_4\text{O}_{11}$                 | 2M $\text{ZnSO}_4$                         | 0.4-1.4     | ~240 (0.1 A/g)                   | ~66%/100 @ 1A/g    | 3   |
| $\beta\text{-AgVO}_3$                                | 2M $\text{ZnSO}_4$                         | 0.4-1.4     | 300 (0.05 A/g)                   | <25%/100 @ 1A/g    | 3   |
| $\text{Ag}_4\text{V}_2\text{O}_7$                    | 2M $\text{ZnSO}_4$                         | 0.4-1.4     | 160 (0.1 A/g)                    | <66%/100 @ 1A/g    | 3   |
| $\text{Ag}_2\text{V}_4\text{O}_{11}$                 | 3M $\text{Zn}(\text{CF}_3\text{SO}_3)_2$   | 0.4-1.7     | 210 (0.1A/g)                     | 93%/6000 @ 5A/g    | 4   |
| $\text{Ag}_{0.33}\text{V}_2\text{O}_5@V_2\text{O}_5$ | 3M $\text{Zn}(\text{CF}_3\text{SO}_3)_2$   | 0.2-1.8     | 312 (0.5A/g)                     | 90%/100 @ 0.5A/g   | 5   |
| $\beta\text{-AgVO}_3$                                | 1.5M $\text{ZnSO}_4$                       | 0.4-1.3     | 283 (0.1 A/g)                    | 65%/200 @ 0.1A/g   | 6   |
| $\text{CuV}_2\text{O}_6$                             | 3M $\text{Zn}(\text{CF}_3\text{SO}_3)_2$   | 0.3-1.6     | 427 (0.1A/g)                     | 99%/3000 @ 5A/g    | 7   |
| $\text{Cu}_{0.95}\text{V}_2\text{O}_5$               | 3M $\text{Zn}(\text{CF}_3\text{SO}_3)_2$   | 0.2-1.6     | 405 (0.1A/g)                     | 75%/100 @ 0.5A/g   | 8   |
| $\text{Cu}_{0.34}\text{V}_2\text{O}_5$               | 6M $\text{ZnSO}_4$                         | 0.25-1.8    | 315 (0.02A/g)                    | 91%/1000 @ 0.8A/g  | 9   |
| $\text{Cu}_3(\text{OH})_2\text{V}_2\text{O}_7$       | 3M $\text{ZnSO}_4$                         | 0.4-1.4     | 336 (1A/g)                       | ~100%/3000 @ 10A/g | 10  |
| $\text{Cu}_3(\text{OH})_2\text{V}_2\text{O}_7$       | 2.5M $\text{Zn}(\text{CF}_3\text{SO}_3)_2$ | 0.2-1.6     | 216 (0.1A/g)                     | 89%/500 @ 0.5A/g   | 11  |
| $\text{Cu}_x\text{V}_2\text{O}_5$                    | 2M $\text{ZnSO}_4$                         | 0.3-1.4     | 300 (2A/g)                       | 88%/10000 @ 10A/g  | 12  |

Table S1: Metrics for Ag or Cu-Vanadium oxide cathodes in Aqueous Zinc Ion Batteries.

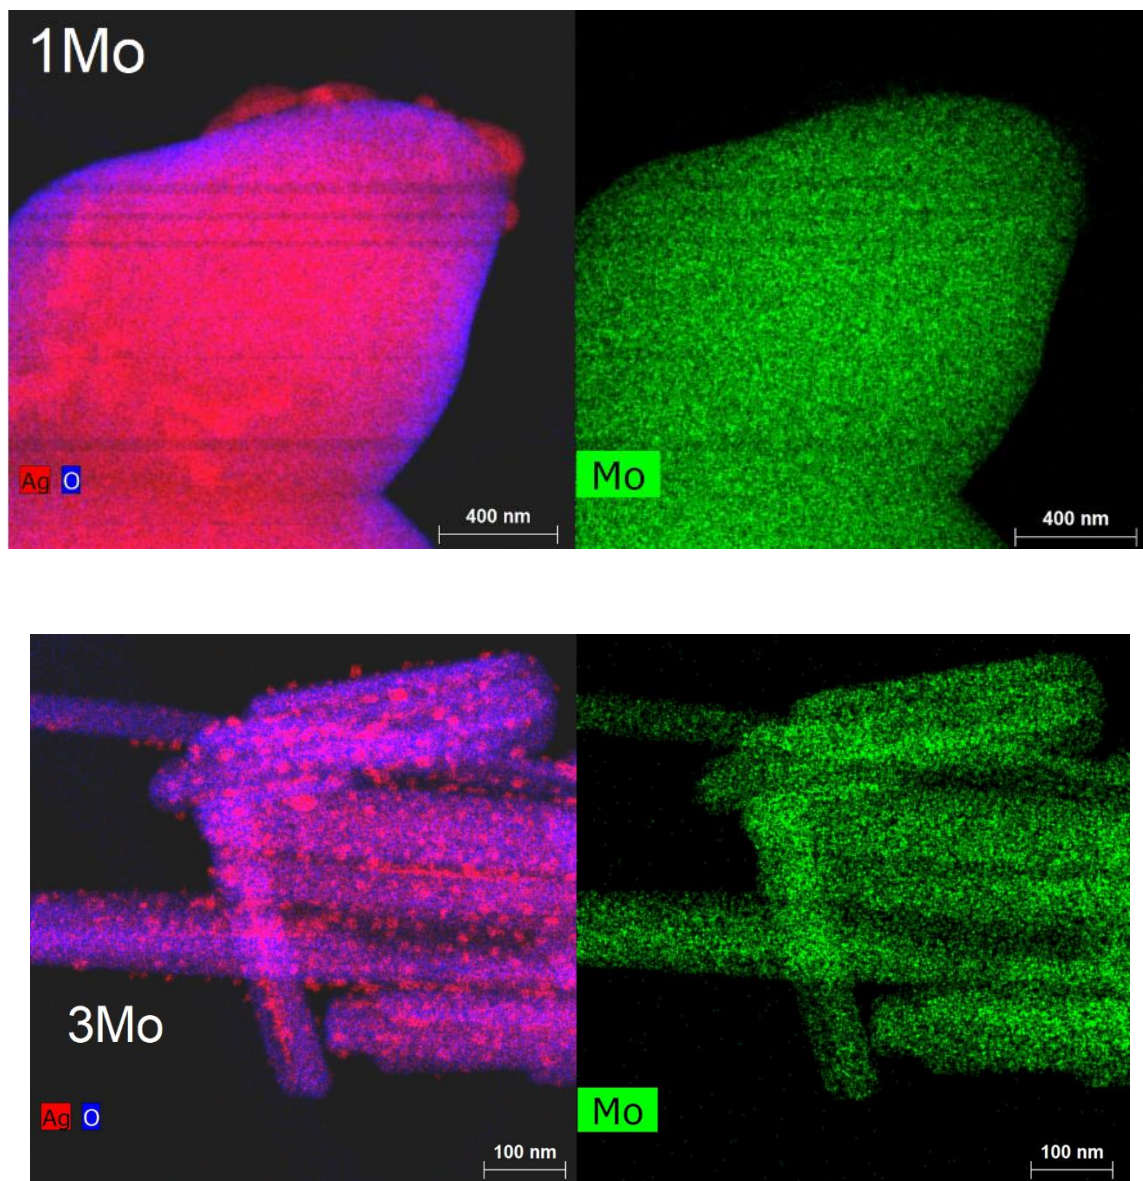

**Figure S1:** EDS evidence for  $\text{Ag}^+$  autoreduction in the TEM beam. In **1Mo** and **3Mo** the surface particles/protrusions are clearly resolved as pure Ag.

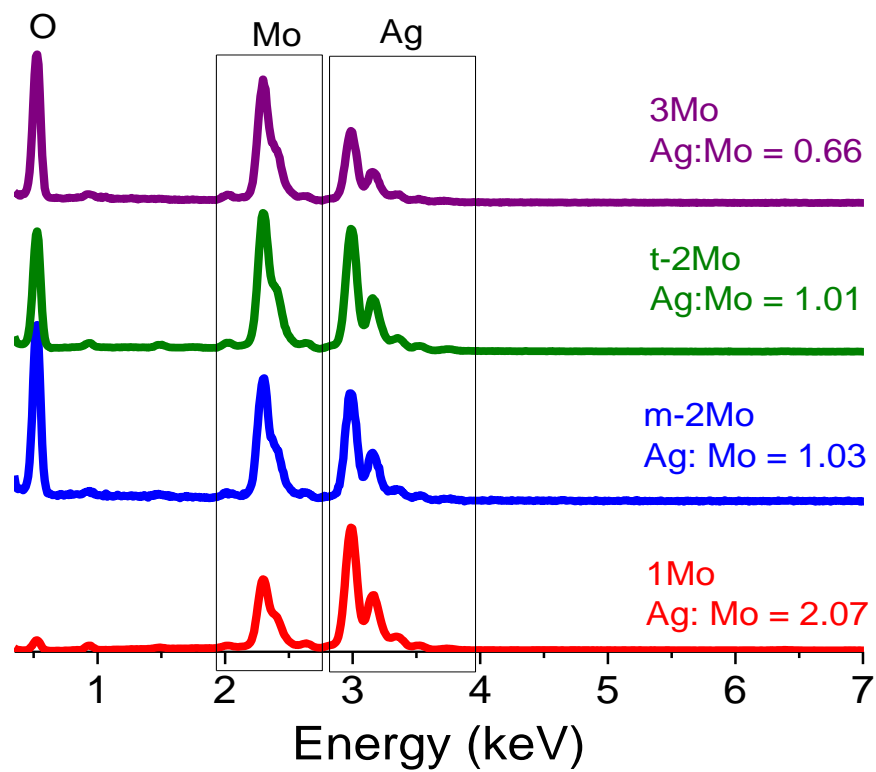

**Figure S2:** EDS spectra for the HAADF images in the manuscript's Figure 1.

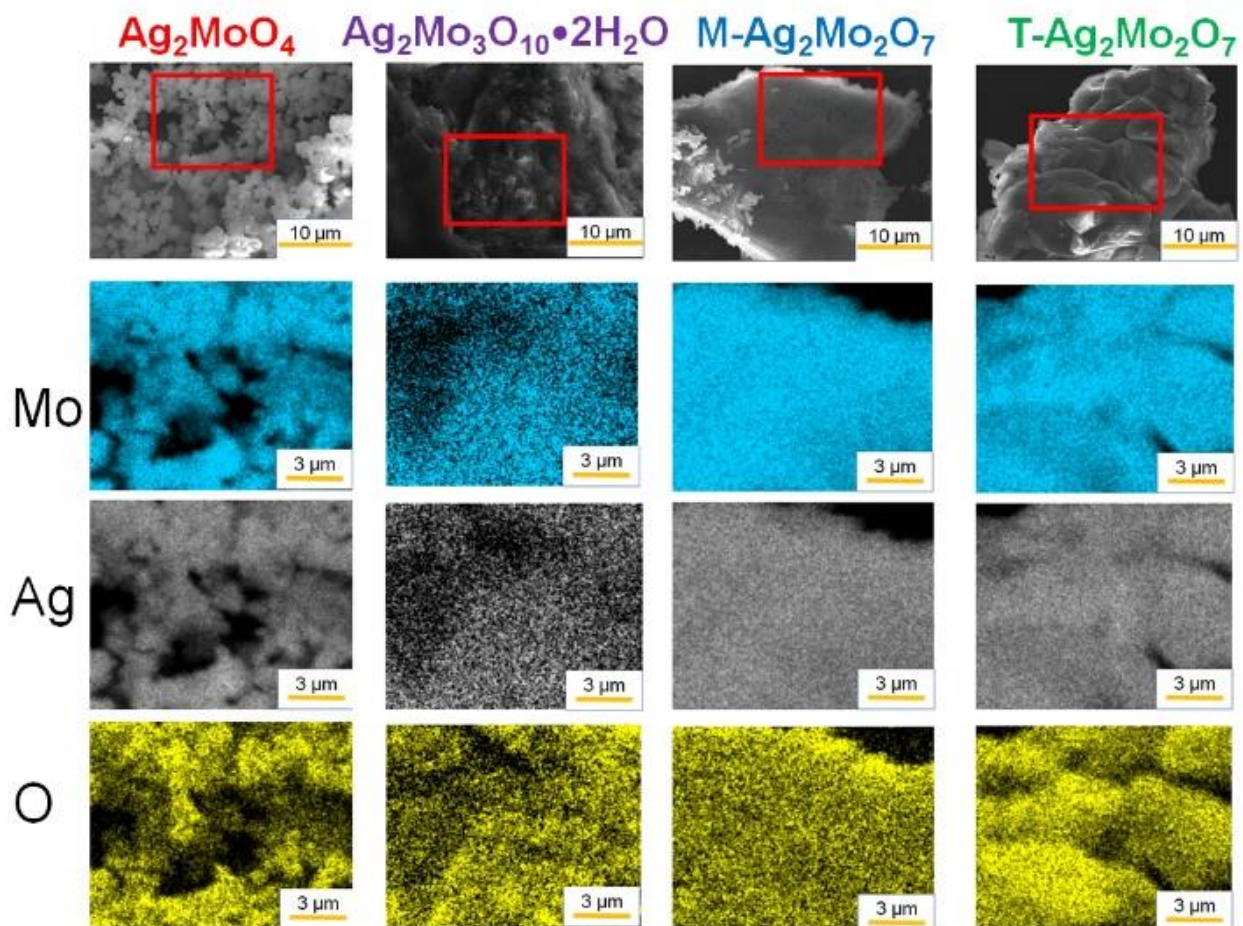

**Figure S3.** SEM images at 3000x magnification; the red box indicates the region analyzed by EDS mapping.

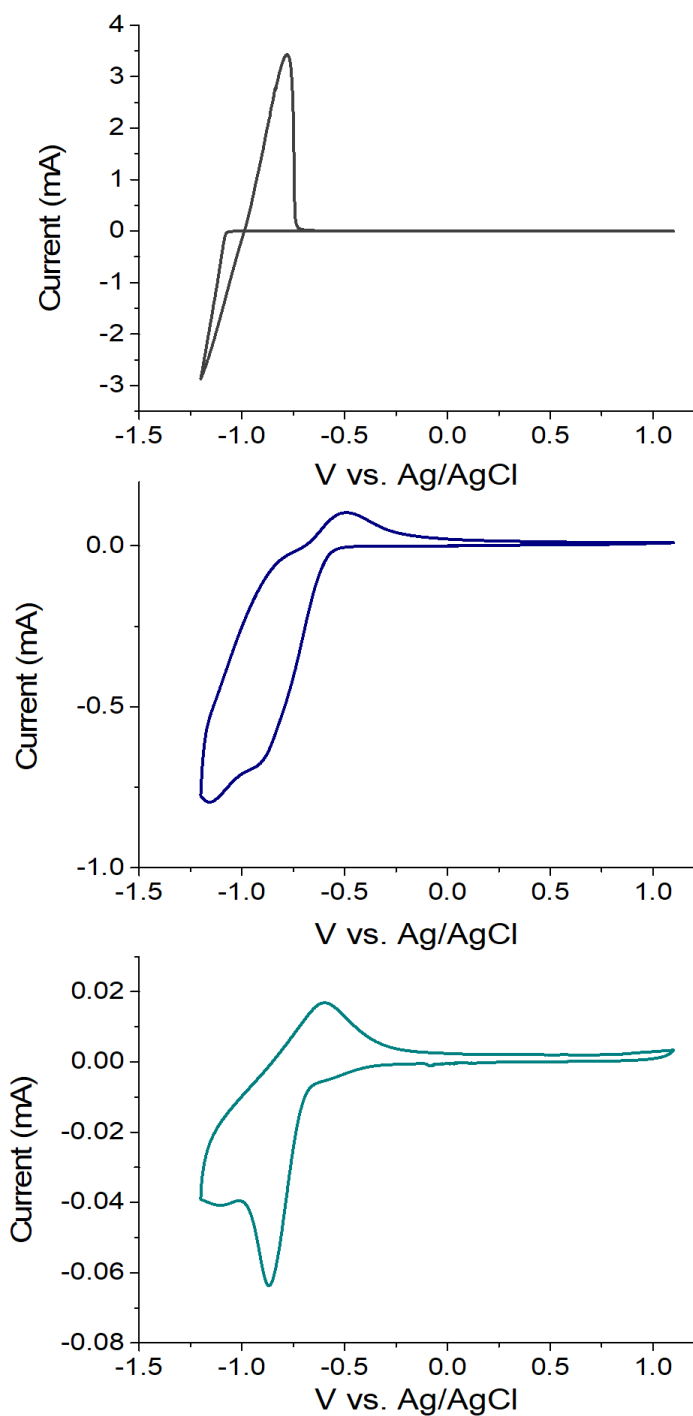

**Fig S4:** Cyclic voltammograms (20 mV/s) at a glassy carbon electrode of aqueous (top, grey)  $\text{ZnSO}_4$ , (middle, blue)  $(\text{NH}_4)_2\text{Mo}_2\text{O}_7$  and (bottom, cyan)  $\text{Na}_2\text{MoO}_4$ .

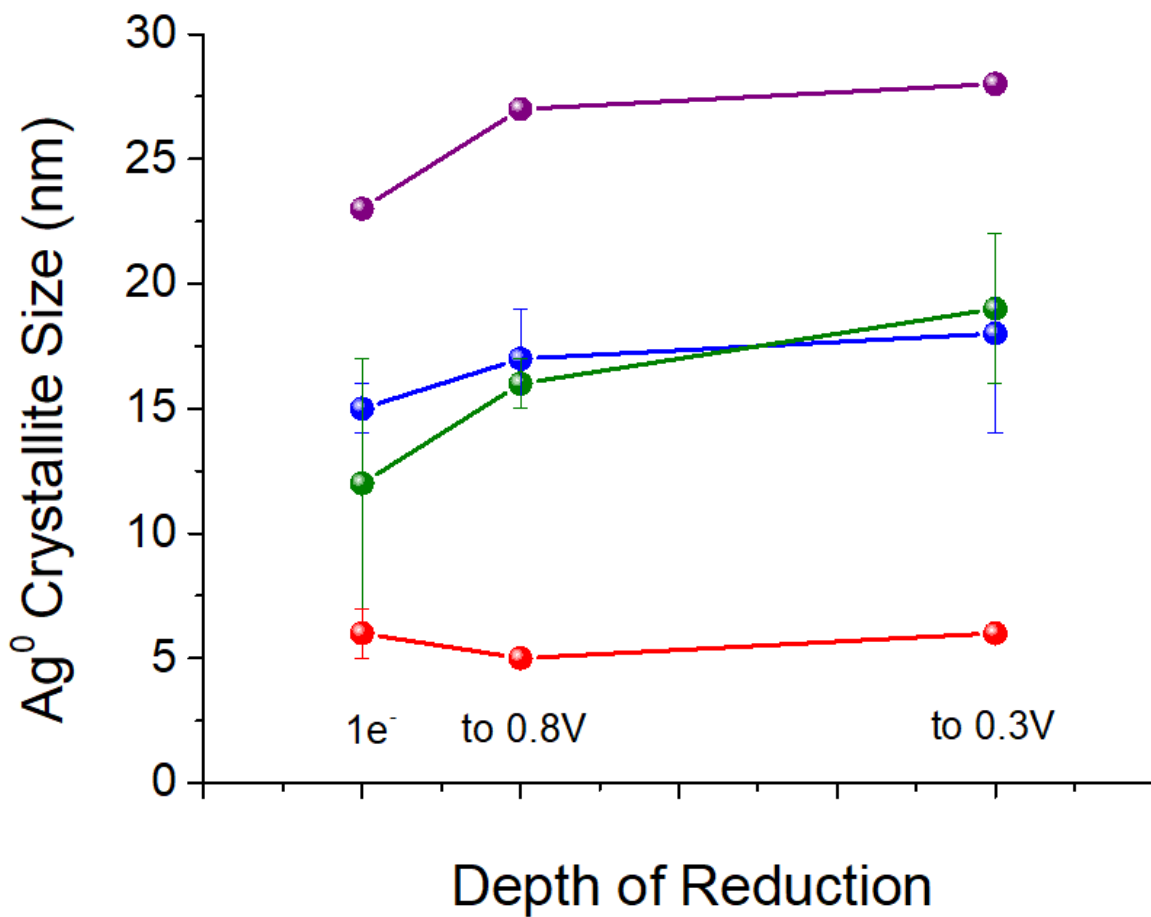

**Fig S5:** The Scherrer equation determines the Ag crystallite size for each SMO as a function of its reduction. Red: **1Mo**, Blue: **m-2Mo**, Green: **t-2Mo**, Purple: **3Mo**.

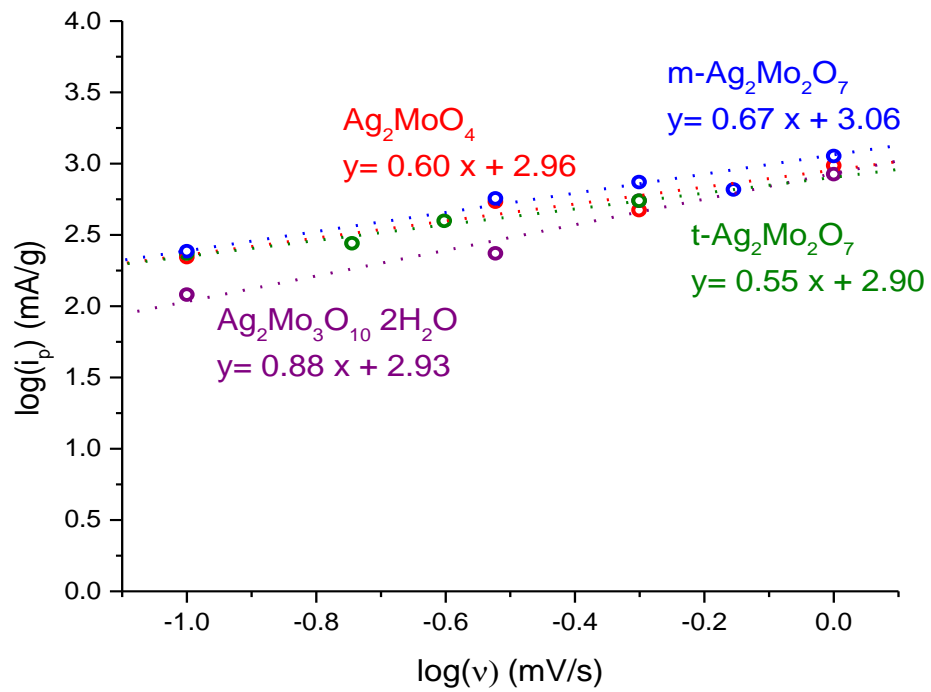

**Fig S6:** A plot of  $\log(i)$  vs.  $\log(v)$  from variable rate CV's yield a line with slope  $b$  between 0.5 (pure diffusion) and 1 (pure capacitance). Here we plot the peak current for the reduction of silver in each SMO.



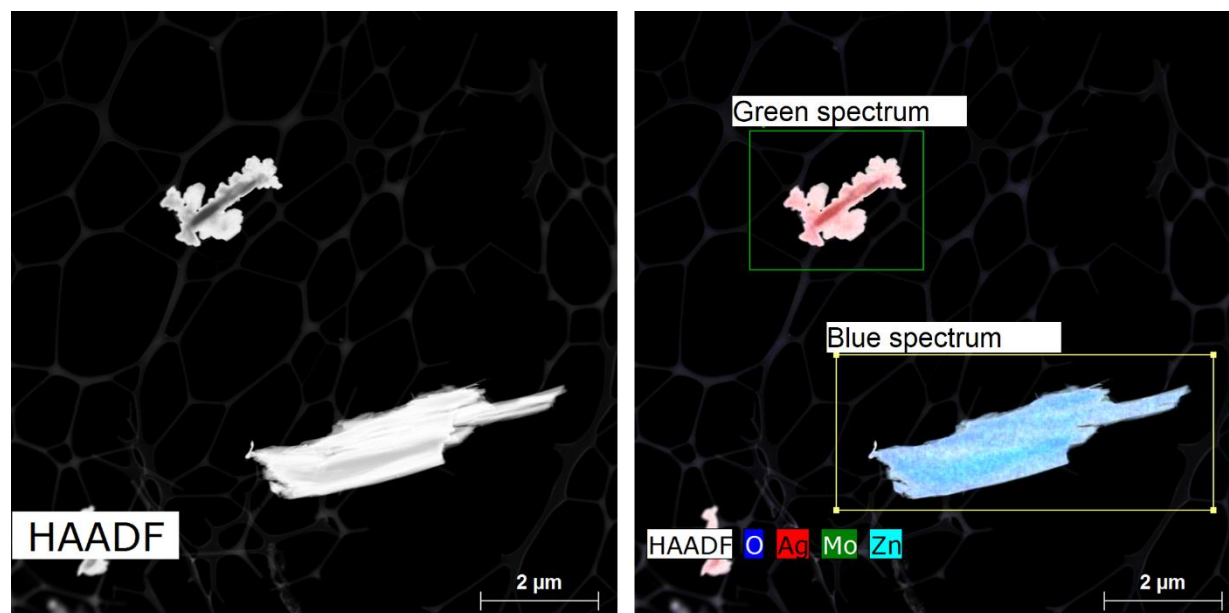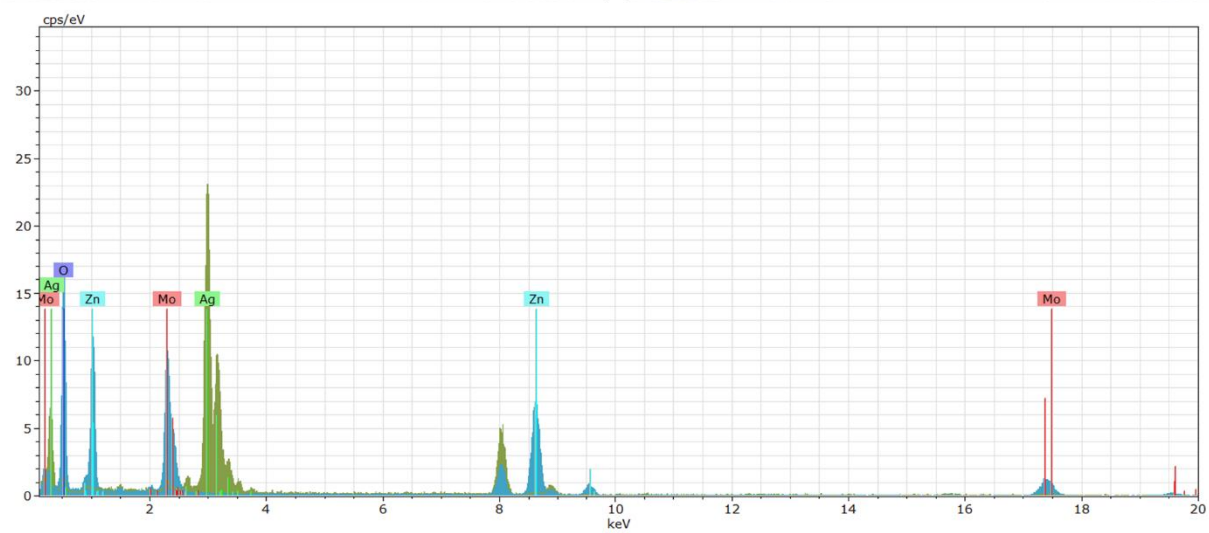

**Figure S7:** A HAADF/STEM image with EDS data from a 0.8V reduced **m-2Mo** electrode.

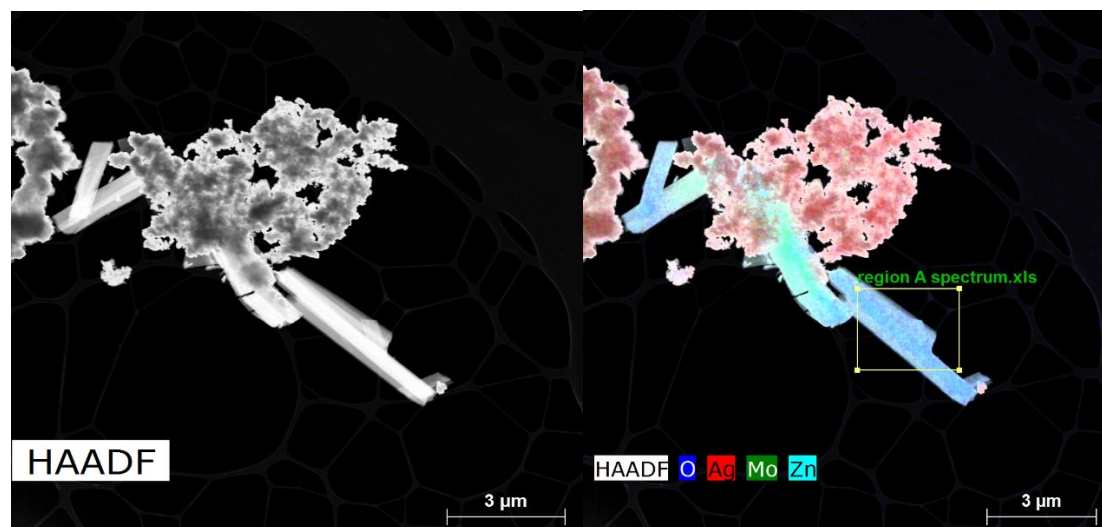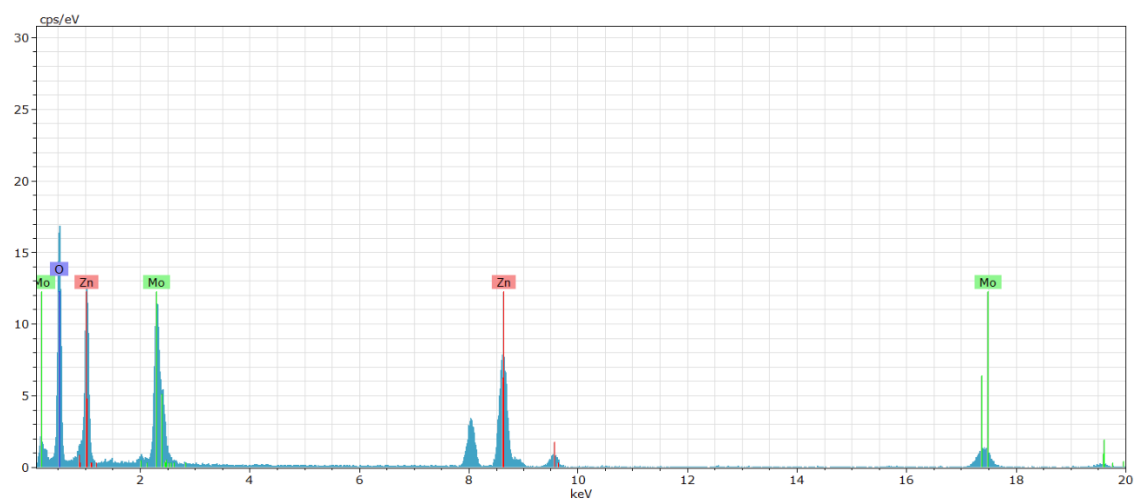

**Figure S8:** A HAADF/STEM image with EDS data from a 0.8V reduced **t-2Mo** electrode. The spectrum provided is for the region in the yellow box.

# M-Ag<sub>2</sub>Mo<sub>2</sub>O<sub>7</sub>

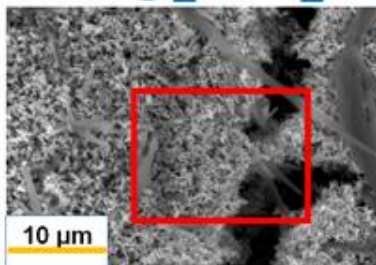

Ag

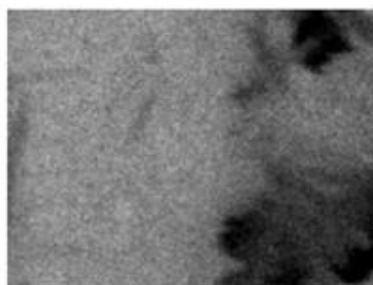

Zn

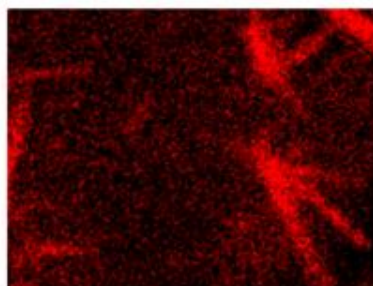

Mo

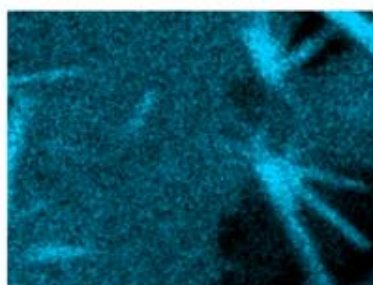

O

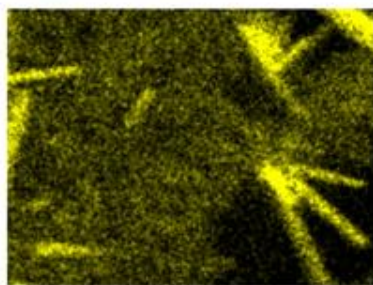

**Figure S9:** SEM/EDS characterization of 0.8V- reduced m-2Mo.

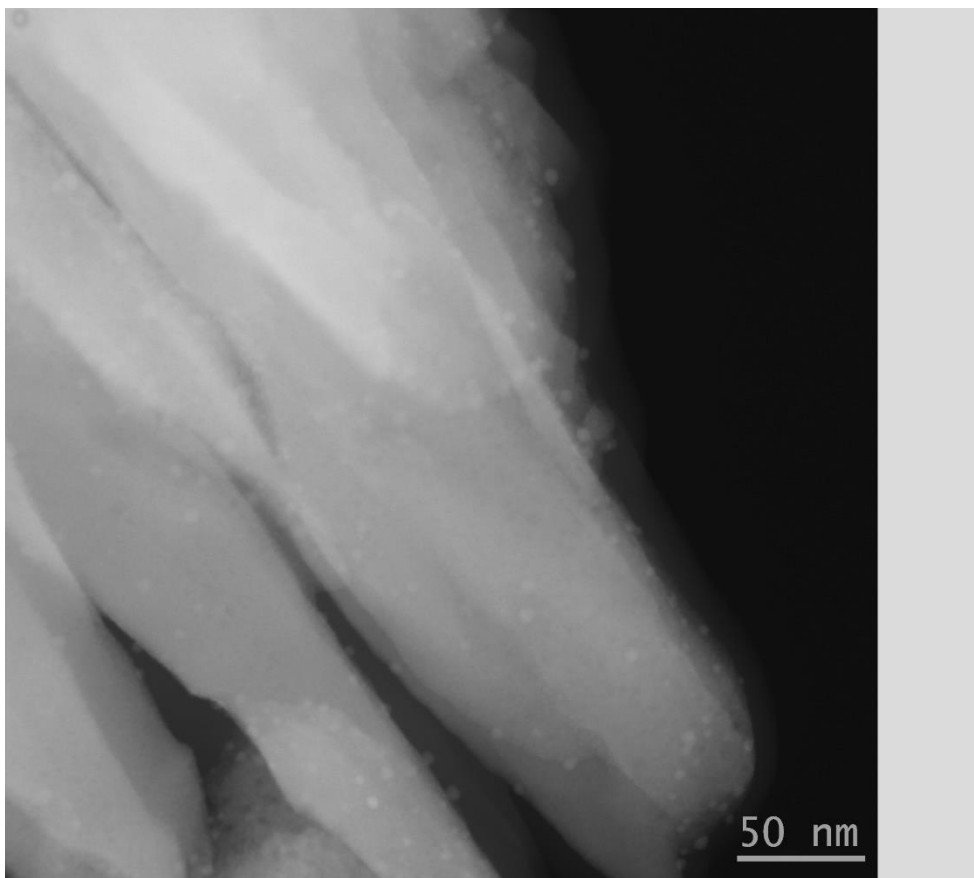

Figure S10: Zoomed in view of a **1Mo** particle reduced to 0.8V.

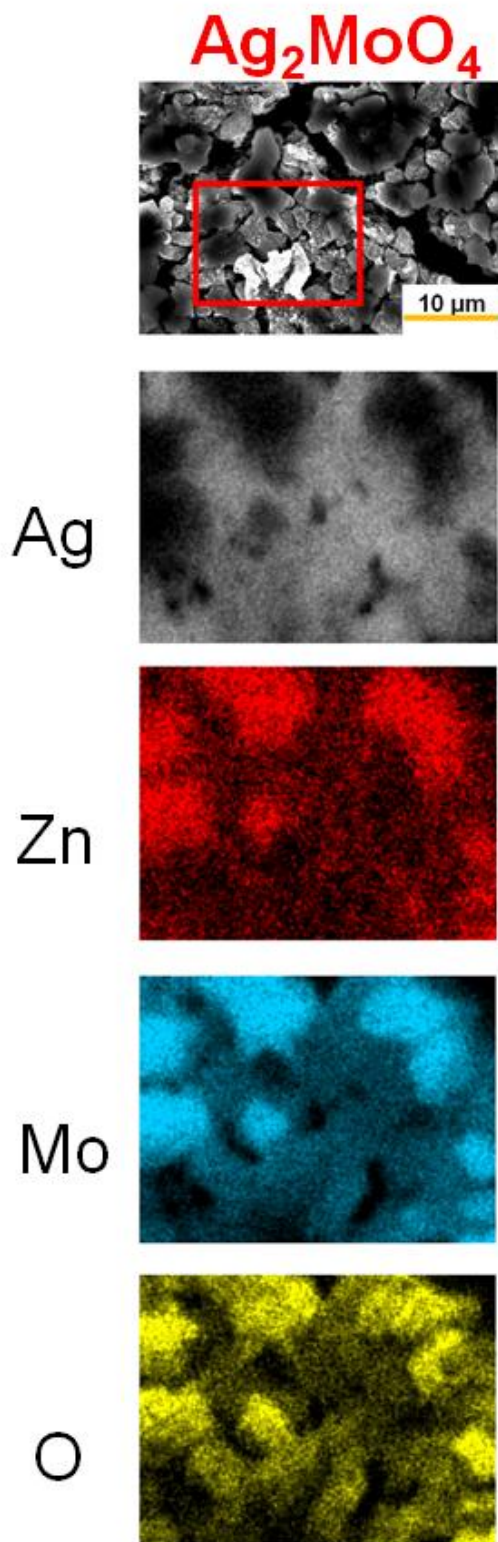

**Figure S11:** SEM/EDS characterization of 0.8V- reduced **1Mo**.

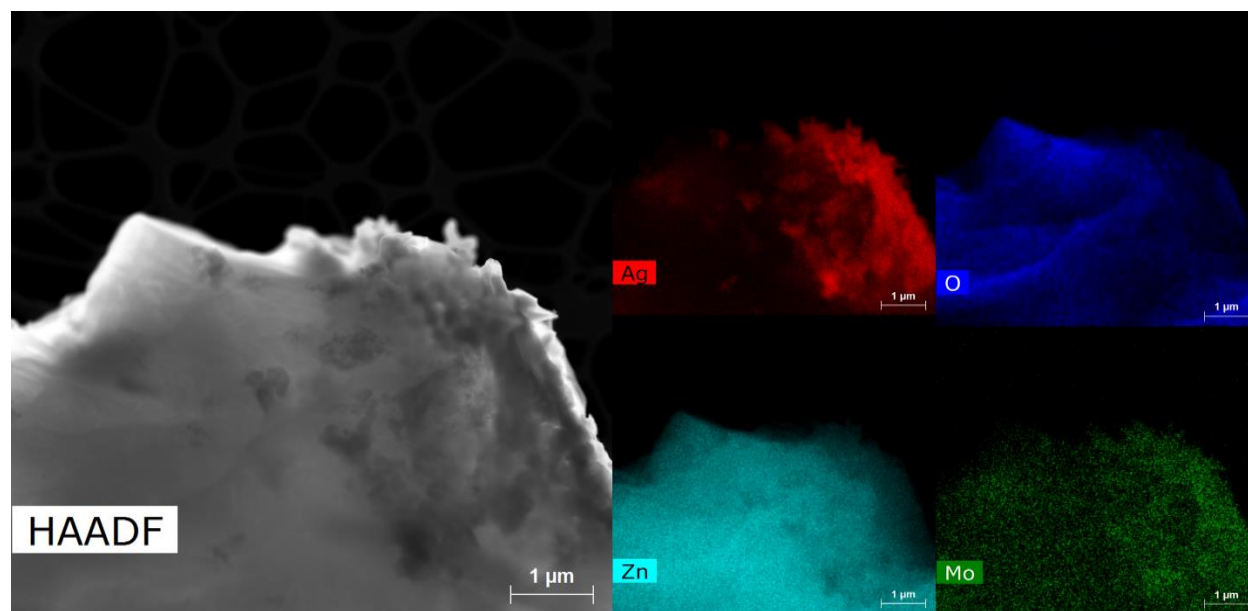

**Figure S12:** An example of a Zn-O rich particle detected by HAADF/EDS from a 0.8V-reduced **3Mo** electrode; Zn and O represent 74% of the sample shown.

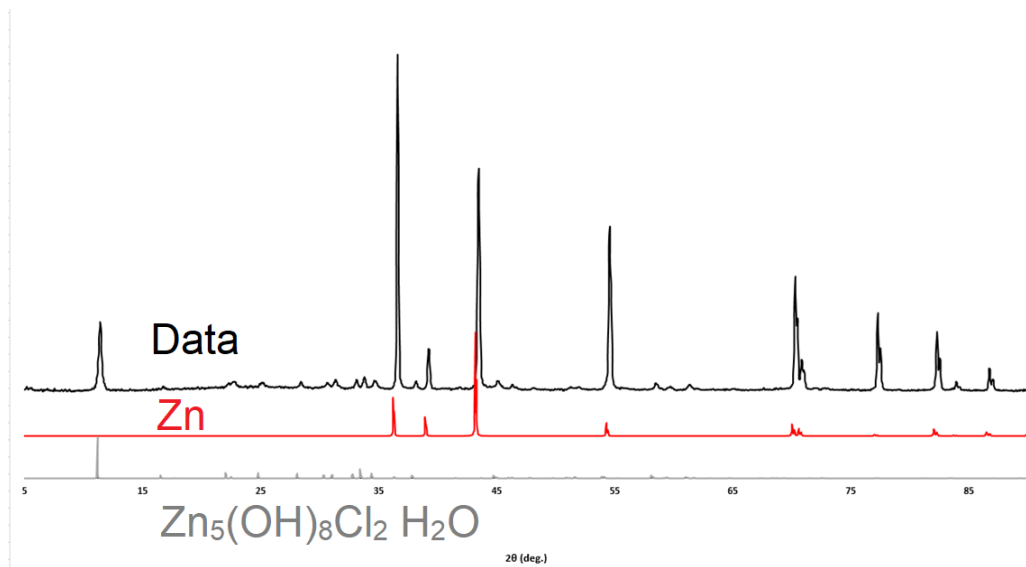

**Figure S13:** PXRD data of the anode following discharge of **3Mo** in 2M  $ZnCl_2$  electrolyte.

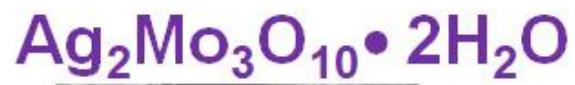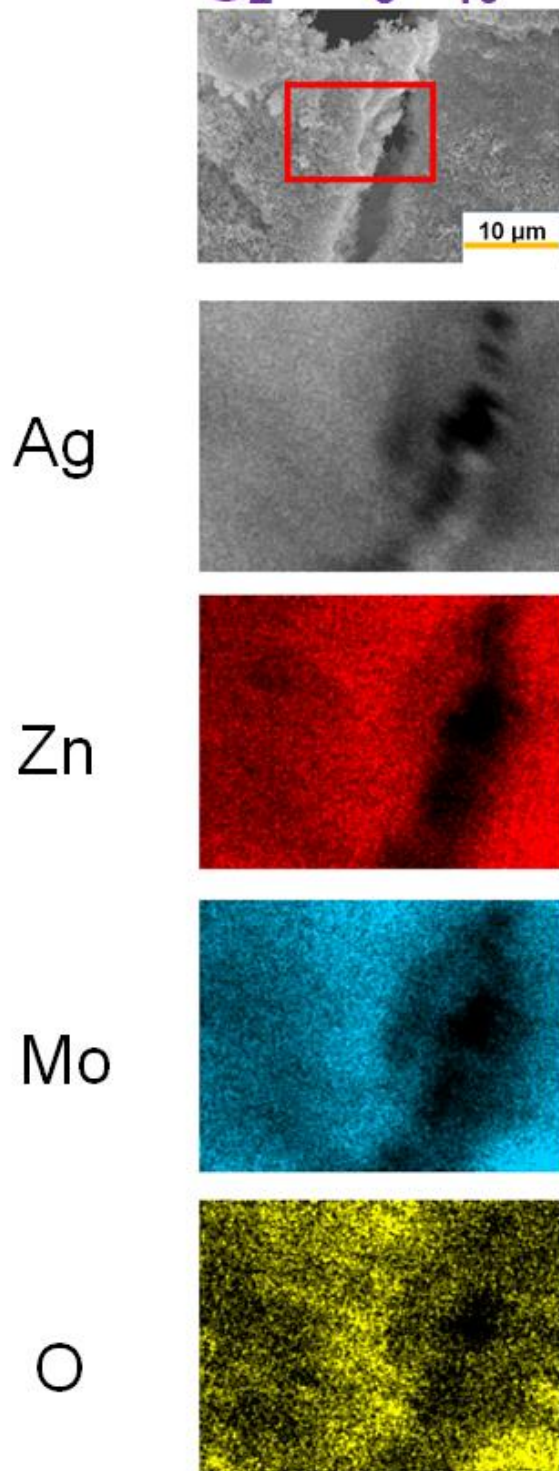

**Figure S14:** SEM/EDS characterization of 0.8V- reduced **3Mo**. This image clearly contrasts with Figures S9 and S11.



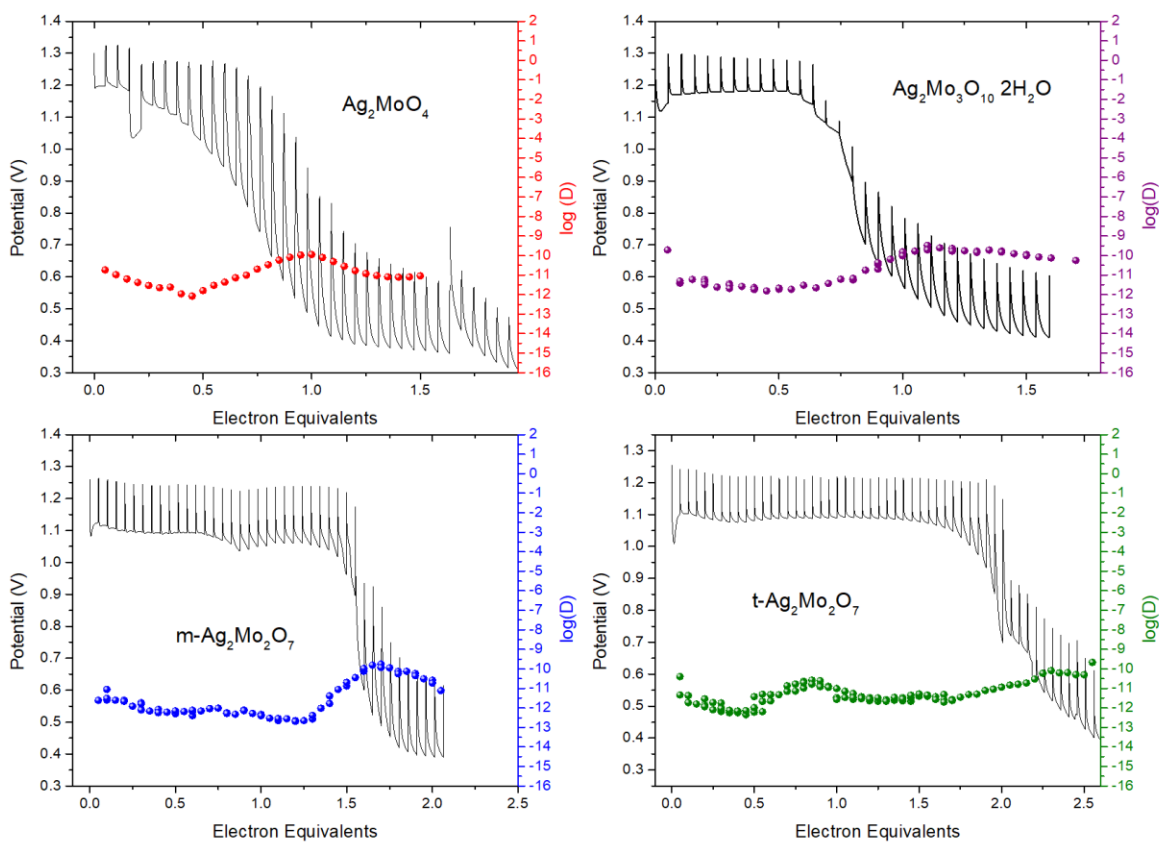

Figure S15. Black traces: Representative data following relaxation after  $0.5e^-/\text{hr}$  pulses (black traces). Colored circles: Depict 10-pt average smoothed data for  $\log(D)$  for three replicates.

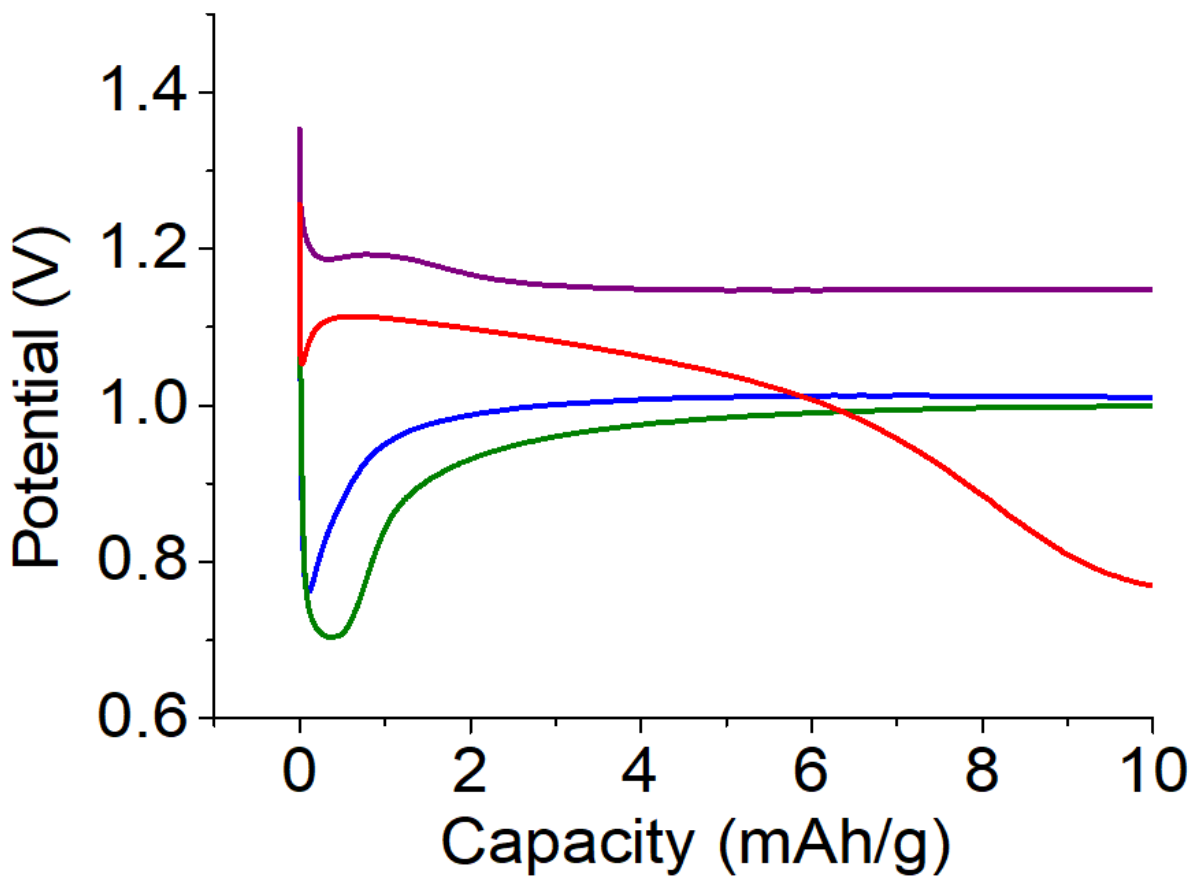

**Fig S16:** Galvanostatic discharge at 40 mA/g for all SMO's. Purple: **3Mo**, Red: **1Mo**, Blue: **m-2Mo**, Green: **t-2Mo**. The voltage recovery for t-2Mo is clearly slower than its compositional analog m-2Mo.

## Discussion of 3Mo synthesis:

Hexagonal  $\text{MoO}_3$  represents a class of materials with the formula  $\text{M}_x\text{H}_y\text{MoO}_{3-\delta}$ , where M can be a variety of monovalent cations.<sup>13–15</sup> The 120°C hydrothermal reaction of  $\text{Na}_2\text{MoO}_4$  and 3 eq.  $\text{CH}_3\text{NH}_3\text{Cl}$  (which forms  $(\text{CH}_3\text{NH}_3)_2\text{Mo}_7\text{O}_{22}$ ) reported by Dessapt et. al.<sup>16</sup> is considerably time dependent in large part due to hexagonal impurity. If the reaction proceeds longer than 6 hours, hexagonal  $\text{MoO}_3$  becomes the predominant phase; we note that we are not the first to observe hexagonal  $\text{MoO}_3$  as a cocrystallized impurity in a synthesis of  $(\text{CH}_3\text{NH}_3)_2\text{Mo}_7\text{O}_{22}$ .<sup>17</sup> If the reaction proceeds shorter than 5 hours, formation of  $(\text{CH}_3\text{NH}_3)_2\text{Mo}_7\text{O}_{22}$  is incomplete. While we are not sure of the identity of this intermediate phase at this time, we found it reacted with  $\text{Ag}^+$  under acidic conditions to yield phase-pure hexagonal  $\text{MoO}_3$ . Hence, the synthesis of  $(\text{CH}_3\text{NH}_3)_2\text{Mo}_7\text{O}_{22}$  potentially can yield either hexagonal  $\text{MoO}_3$  directly or an intermediate which forms hexagonal  $\text{MoO}_3$  in the second step (reaction with silver). It becomes crucial to isolate  $(\text{CH}_3\text{NH}_3)_2\text{Mo}_7\text{O}_{22}$  after it is fully formed and before it further reacts to become hexagonal- $\text{MoO}_3$ .

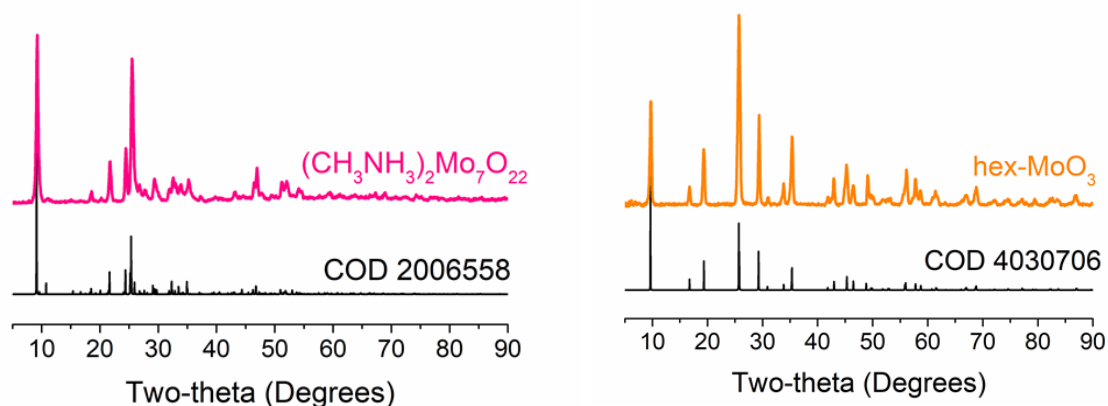

The hexagonal phase is most stabilized in strongly acidic conditions. Therefore, pH alleviates this issue significantly: we found if the reaction occurs at pH 1.5, the hexagonal impurity is avoided more efficiently than at pH 1. Notably reaction of  $(\text{CH}_3\text{NH}_3)_2\text{Mo}_7\text{O}_{22}$  with  $\text{Ag}^+$  at  $\text{pH} > 1$  formed the kinetically favorable  $m\text{-Ag}_2\text{Mo}_2\text{O}_7$ , so changes in pH in the second step are not possible. Rather, our modifications reflected in the Experimental section best avoid the hexagonal impurity by reacting  $(\text{CH}_3\text{NH}_3)_2\text{Mo}_7\text{O}_{22}$  with a small excess of  $\text{Ag}^+$  at pH 1, and with longer reaction times ( $> 6$  hr). This excess favors the formation of the more silver-rich  $\text{Ag}_2\text{Mo}_3\text{O}_{10}$  over  $\text{Ag}_{0.16}\text{H}_x\text{MoO}_3$ , and the low pH avoids thermodynamically favorable triclinic  $\text{Ag}_2\text{Mo}_2\text{O}_7$ .

Pure  $(\text{CH}_3\text{NH}_3)_2\text{Mo}_7\text{O}_{22}$  obtains a blue tint in direct light and following XRD measurement.<sup>18</sup> We found the use of blue tinted  $(\text{CH}_3\text{NH}_3)_2\text{Mo}_7\text{O}_{22}$  in the second step does not change the phase purity of the  $\text{Ag}_2\text{Mo}_3\text{O}_{10} \cdot 2\text{H}_2\text{O}$  product and we believe any XRD-reduced Mo dissolves in the acidic conditions. Nonetheless, for this manuscript we only report data on  $\text{Ag}_2\text{Mo}_3\text{O}_{10} \cdot 2\text{H}_2\text{O}$  synthesized using  $(\text{CH}_3\text{NH}_3)_2\text{Mo}_7\text{O}_{22}$  sample portions that were not x-rayed directly.

- (1) Lan, B.; Peng, Z.; Chen, L.; Tang, C.; Dong, S.; Chen, C.; Zhou, M.; Chen, C.; An, Q.; Luo, P. *J. Alloys Compd.* **2019**, *787*, 9–16.
- (2) Shan, L.; Yang, Y.; Zhang, W.; Chen, H.; Fang, G.; Zhou, J.; Liang, S. *Energy Storage Mater.* **2019**, *18*, 10–14.
- (3) Guo, S.; Fang, G.; Liang, S.; Chen, M.; Wu, X.; Zhou, J. *Acta Mater.* **2019**, *180*, 51–59.
- (4) Li, Q.; Liu, Y.; Ma, K.; Yang, G.; Wang, C. *Small Methods* **2019**, *3*, 1900637.
- (5) Zeng, J.; Chao, K.; Wang, W.; Wei, X.; Liu, C.; Peng, H.; Zhang, Z.; Guo, X.; Li, G. *Inorg. Chem. Front.* **2019**, *6*, 2339–2348.
- (6) Liu, H.; Wang, J.; Sun, H.; Li, Y.; Yang, J.; Wei, C.; Kang, F. *J. Colloid Interface Sci.* **2020**, *560*, 659–666.
- (7) Liu, Y.; Li, Q.; Ma, K.; Yang, G.; Wang, C. *ACS Nano* **2019**, *13*, 12081–12089.
- (8) Yu, X.; Hu, F.; Guo, Z.-Q. Q.; Liu, L.; Song, G.-H. H.; Zhu, K. *Rare Met.* **2021**.
- (9) Chae, M. S.; Attias, R.; Dlugatch, B.; Gofer, Y.; Aurbach, D. *ACS Appl. Energy Mater.* **2021**, *4*, 10197–10202.
- (10) Shan, L.; Zhou, J.; Han, M.; Fang, G.; Cao, X.; Wu, X.; Liang, S. *J. Mater. Chem. A* **2019**, *7*, 7355–7359.
- (11) Chen, L.; Yang, Z.; Wu, J.; Chen, H.; Meng, J. *Electrochim. Acta* **2020**, *330*, 135347.
- (12) Yang, Y.; Tang, Y.; Liang, S.; Wu, Z.; Fang, G.; Cao, X.; Wang, C.; Lin, T.; Pan, A.; Zhou, J. *Nano Energy* **2019**, *61*, 617–625.
- (13) McCarron, E. .; Thomas, D. M.; Calabrese, J. C. *Inorg. Chem.* **1987**, *26*, 370–373.
- (14) Guo, J.; Zavalij, P.; Whittingham, M. S. *J. Solid State Chem.* **1995**, *117*, 323–332.
- (15) Lunk, H.; Hartl, H.; Hartl, M. A.; Fait, M. J. G.; Shenderovich, I. G.; Feist, M.; Frisk, T. A.; Daemen, L. L.; Mauder, D.; Eckelt, R.; Gurinov, A. A. *Inorg. Chem.* **2010**, *49*, 9400–9408.
- (16) Hakouk, K.; Deniard, P.; Lajaunie, L.; Guillot-Deudon, C.; Harel, S.; Wang, Z.; Huang, B.; Koo, H.-J.; Whangbo, M.-H.; Jobic, S.; Dessapt, R. *Inorg. Chem.* **2013**, *52*, 6440–6449.
- (17) Cui, X.; Yu, S. H.; Li, L.; Biao, L.; Li, H.; Mo, M.; Liu, X. M. *Chem. - A Eur. J.* **2004**, *10*, 218–223.
- (18) Zavalij, P. Y.; Whittingham, M. S. *Acta Crystallogr. Sect. C Cryst. Struct. Commun.* **1997**, *53*, 1374–1376.
